# Supplementary material for: Novel dansyl-appended calix[4]arene frameworks: fluorescence properties and mercury sensing
Source: Royal Society of Chemistry journal article supplement (doi:10.1039/b815379e), 2008-11-18
Supplement: b815379e.pdf [file b815379e.pdf]

## **ELECTRONIC SUPPLEMENTARY INFORMATION (ESI)**

### **Novel dansyl-appended calix[4]arene frameworks: fluorescence properties and mercury sensing**

Shubha Pandey,<sup>a,b</sup> Amir Azam,<sup>\*a</sup> Siddharth Pandey<sup>\*b</sup> and H. M. Chawla,<sup>\*b</sup>

<sup>a</sup>*Department of Chemistry, Jamia Millia Islamia, New Delhi – 110028, India.*

<sup>b</sup>*Department of Chemistry, Indian Institute of Technology Delhi, Hauz Khas, New Delhi – 110016, India.*

\* To whom the correspondence should be addressed.

*E-mail: [sipandey@chemistry.iitd.ac.in](mailto:sipandey@chemistry.iitd.ac.in) (SP); Tel: +91-11-26596503*

## Table of Contents

|                                                                                                                                                                                                                           | Page No. |
|---------------------------------------------------------------------------------------------------------------------------------------------------------------------------------------------------------------------------|----------|
| $^{13}\text{C}$ NMR ( $\text{CDCl}_3$ ) spectra of t-Bu/(OH) $_2$ Dan $_2$ (Figure S1)                                                                                                                                    | 3        |
| $^{13}\text{C}$ NMR ( $\text{CDCl}_3$ ) spectra of NO $_2$ /Dan $_4$ (Figure S2)                                                                                                                                          | 3        |
| Low-temperature $^1\text{H}$ NMR ( $\text{CDCl}_3$ ) spectra of NO $_2$ /Dan $_4$ (Figure S3)                                                                                                                             | 4        |
| $^1\text{H}$ NMR ( $\text{CDCl}_3$ ) spectra at 32°C, 44°C, and 48°C of NO $_2$ /Dan $_4$ (Figure S4)                                                                                                                     | 5        |
| Percentage reduction in the fluorescence intensity of <b>NO<math>_2</math>/Dan<math>_4</math></b> ( $1 \times 10^{-5}$ M) in the presence of 8 $\mu\text{M}$ each of M $^{n+}$ and Hg $^{2+}$ in acetonitrile (Figure S5) | 5        |
| Calculation of equilibrium constant ( $K_{\text{eq}}$ ) for NO $_2$ /Dan $_4$ -Hg $^{2+}$                                                                                                                                 | 6        |
| $^1\text{H}$ NMR ( $\text{CDCl}_3$ , D $_2$ O exchanged) spectra of H/(OH) $_2$ Dan $_2$                                                                                                                                  | 8        |
| $^{13}\text{C}$ NMR ( $\text{CDCl}_3$ ) spectra of H/(OH) $_2$ Dan $_2$                                                                                                                                                   | 8        |
| $^1\text{H}$ NMR ( $\text{CDCl}_3$ ) spectra of H/Dan $_4$                                                                                                                                                                | 9        |
| $^{13}\text{C}$ NMR ( $\text{CDCl}_3$ ) spectra of H/Dan $_4$                                                                                                                                                             | 9        |
| $^1\text{H}$ NMR ( $\text{CDCl}_3$ ) spectra t-Bu/(Ester) $_2$ Dan $_2$                                                                                                                                                   | 10       |
| $^{13}\text{C}$ NMR ( $\text{CDCl}_3$ ) spectra t-Bu/(Ester) $_2$ Dan $_2$                                                                                                                                                | 10       |
| $^1\text{H}$ NMR ( $\text{CDCl}_3$ ) spectra H/(Ester) $_2$ Dan $_2$                                                                                                                                                      | 11       |
| $^{13}\text{C}$ NMR ( $\text{CDCl}_3$ ) spectra H/(Ester) $_2$ Dan $_2$                                                                                                                                                   | 11       |
| $^1\text{H}$ NMR ( $\text{CDCl}_3$ ) spectra t-Bu/Dan $_1$                                                                                                                                                                | 12       |
| $^{13}\text{C}$ NMR ( $\text{CDCl}_3$ ) spectra t-Bu/Dan $_1$                                                                                                                                                             | 12       |
| $^1\text{H}$ NMR ( $\text{CDCl}_3$ ) spectra NO $_2$ /Dan $_1$                                                                                                                                                            | 13       |
| $^{13}\text{C}$ NMR( $\text{CDCl}_3$ ) spectra NO $_2$ /Dan $_1$                                                                                                                                                          | 13       |

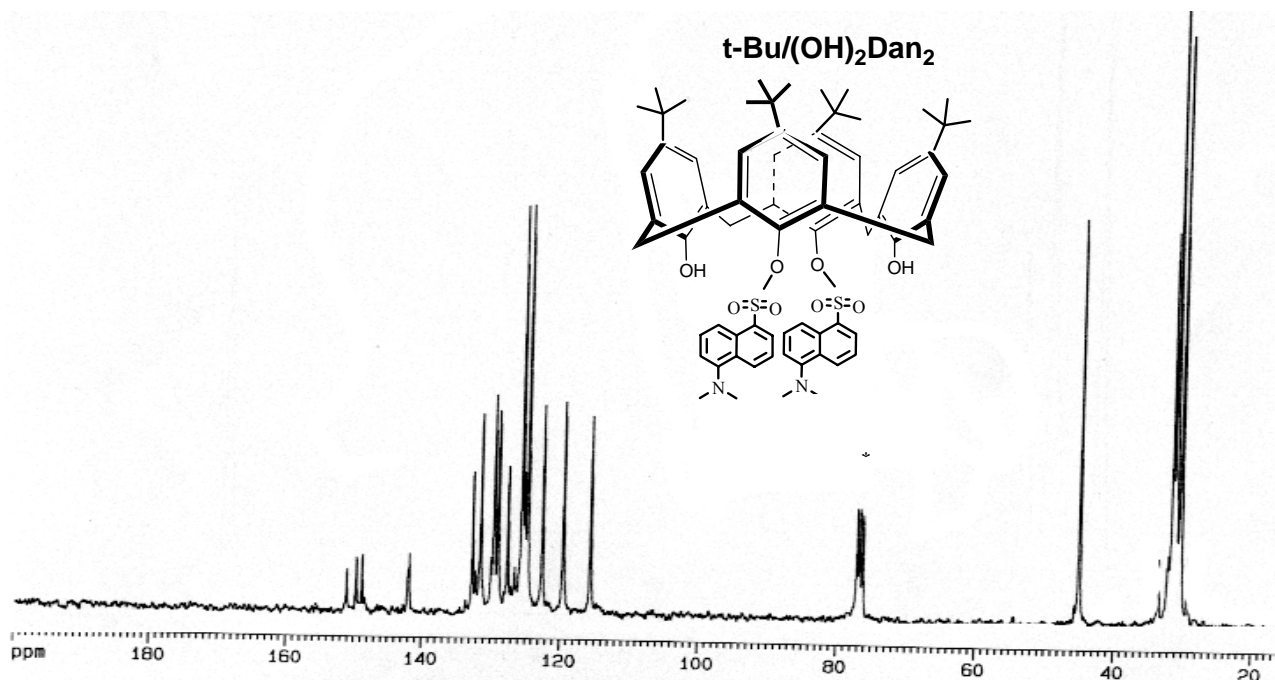

**Figure S1.** <sup>13</sup>C NMR spectra of **t-Bu/(OH)<sub>2</sub>Dan<sub>2</sub>** in CDCl<sub>3</sub> at 25°C. (\*) represents signal due to residual solvents.

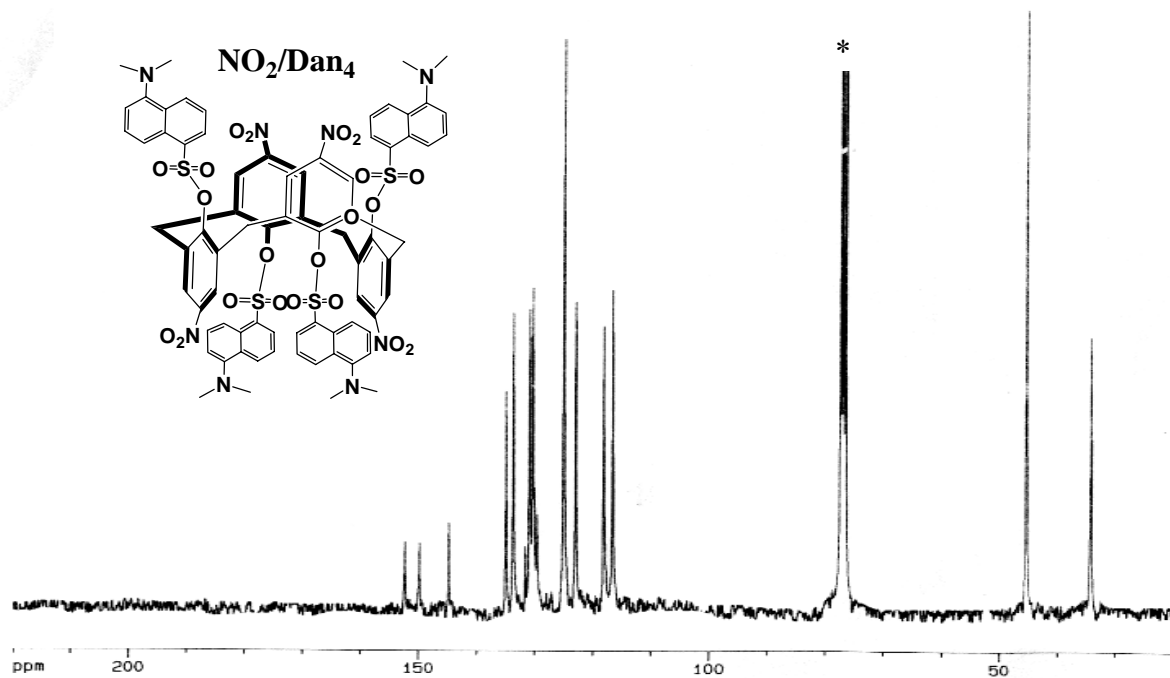

**Figure S2.** <sup>13</sup>C NMR spectra of **NO<sub>2</sub>/Dan<sub>4</sub>** in CDCl<sub>3</sub> at 25°C. (\*) represents signal due to residual solvents.

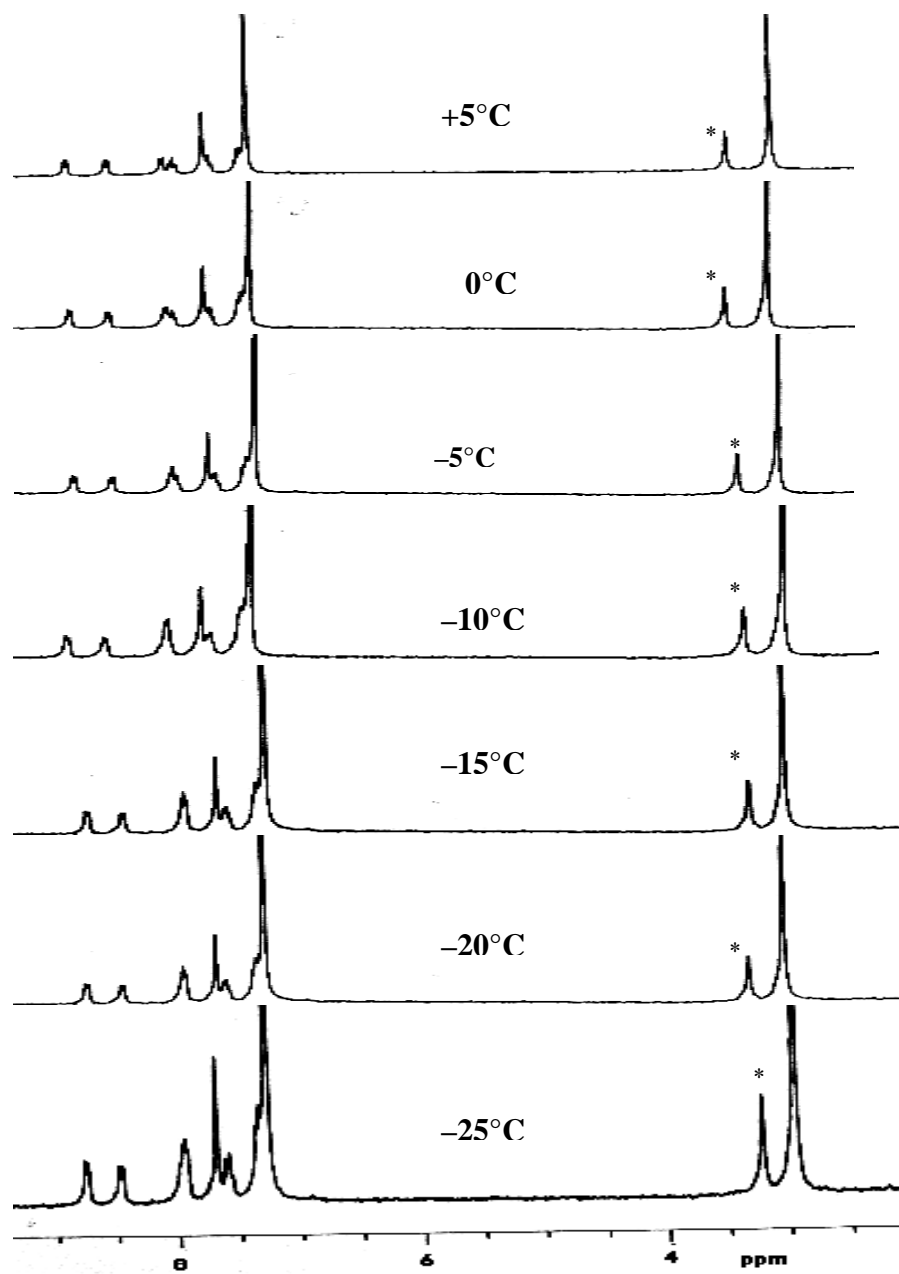

**Figure S3.** Temperature-dependent partial <sup>1</sup>H NMR spectra of NO<sub>2</sub>/Dan<sub>4</sub> in CDCl<sub>3</sub> showing singlet of methylene-bridged protons (peak labeled as \*).

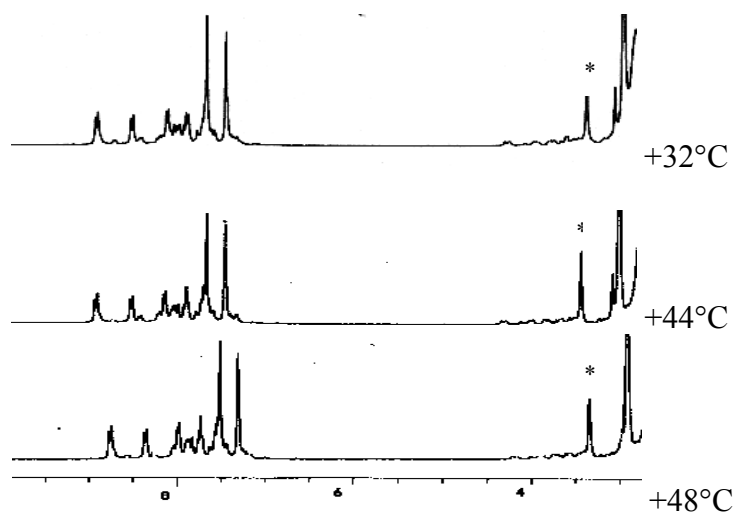

**Figure S4.**  $^1\text{H}$  NMR spectra of  $\text{NO}_2/\text{Dan}_4$  in  $\text{CDCl}_3$  at high temperatures. \* represents singlet for the methylene-bridged protons.

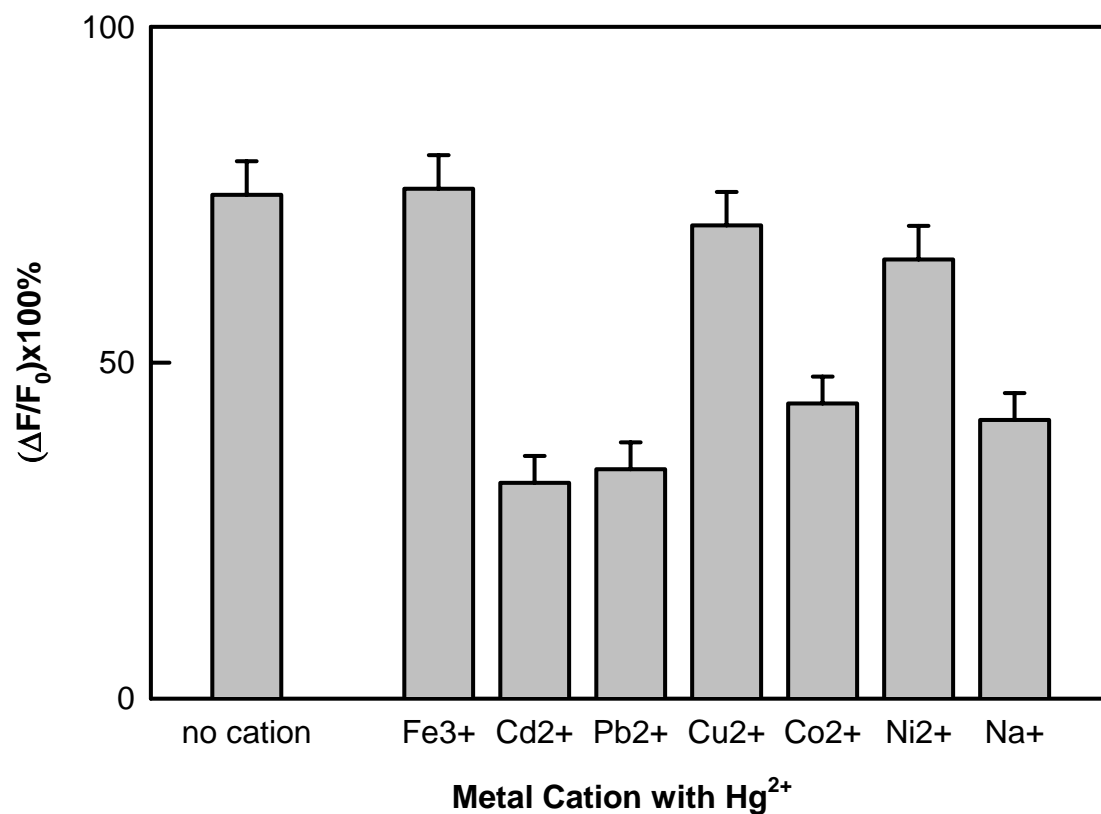

**Figure S5.** % reduction in the fluorescence intensity of  $\text{NO}_2/\text{Dan}_4$  ( $1 \times 10^{-5}$  M) in the presence of  $8 \mu\text{M}$  each of  $\text{M}^{n+}$  and  $\text{Hg}^{2+}$  in acetonitrile at ambient conditions ( $\lambda_{\text{excitation}} = 351$  nm).

### Calculation of Equilibrium Constant ( $K_{eq}$ ).

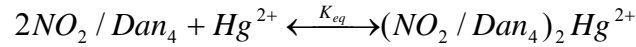

$$@ t = 0 \quad [NO_2 / Dan_4]_0 [Hg^{2+}]_0 \quad 0$$

$$@ t_{eq} \quad ([NO_2 / Dan_4]_0 - 2x) ([Hg^{2+}]_0 - x) \quad x$$

where,

$$K_{eq} = \frac{[(NO_2 / Dan_4)_2 Hg^{2+}]_{eq}}{[NO_2 / Dan_4]_{eq}^2 [Hg^{2+}]_{eq}}$$

$$K_{eq} = \frac{x}{([NO_2 / Dan_4]_0 - 2x)^2 ([Hg^{2+}]_0 - x)}$$

Now, assuming

$$[(NO_2 / Dan_4)_2 Hg^{2+}]_{eq} = x = a_1 \Delta F$$

and

$$[(NO_2 / Dan_4)_2]_{eq} = ([NO_2 / Dan_4]_0 - 2x) = a_2 F$$

where  $\Delta F$  and  $F$  are the decrease in fluorescence intensity and the fluorescence intensity at the wavelength of analysis, respectively; and  $a_1$  and  $a_2$  are the corresponding proportionality constants. Now,

$$K_{eq} = \frac{a_1 \Delta F}{a_2^2 F^2 ([Hg^{2+}]_0 - a_1 \Delta F)}$$

which rearranges to

$$\frac{1}{F^2} = \left( \frac{K_{eq} a_2^2}{a_1} \right) \frac{[Hg^{2+}]_0}{\Delta F} - K_{eq} a_2^2$$

A plot of  $\frac{1}{F^2}$  versus  $\frac{[Hg^{2+}]_0}{\Delta F}$  should be linear with slope =  $\frac{K_{eq} a_2^2}{a_1}$  and y-intercept =  $K_{eq} a_2^2$ .

From y-intercept and knowledge of  $a_2$ ,  $K_{eq}$  is assessed. The parameter  $a_2$  was obtained separately from a linear calibration analysis of  $[NO_2 / Dan_4]$  versus  $F$ , which provides:

$$[NO_2 / Dan_4] = 2.7(\pm 0.1) \times 10^{-6} F; r^2 = 0.9996.$$

Similarly, linear regression analysis of  $\frac{1}{F^2}$  versus  $\frac{[Hg^{2+}]_0}{\Delta F}$  provides following expression:

$$\frac{1}{F^2} = 1.6(\pm 0.2) \times 10^5 \frac{[Hg^{2+}]_0}{\Delta F} - 0.38(\pm 0.10); r^2 = 0.9903$$

From, y-intercept =  $K_{eq} a_2^2 = 0.38(\pm 0.10)$  and  $a_2 = 2.7(\pm 0.1) \times 10^{-6} M$ ;

$$K_{eq} = 5.2(\pm 0.8) \times 10^{10} M^{-2}$$

$^1\text{H}/^{13}\text{C}$  NMR spectra of  $\text{H}/(\text{OH})_2\text{Dan}_2$ ,  $\text{H}/\text{Dan}_4$ ,  $t\text{-Bu}/(\text{Ester})_2\text{Dan}_2$ ,  $\text{H}/(\text{Ester})_2\text{Dan}_2$ ,  $t\text{-Bu}/\text{Dan}_1$ , and  $\text{NO}_2/\text{Dan}_1$ . (\*) represents signal due to residual solvents.

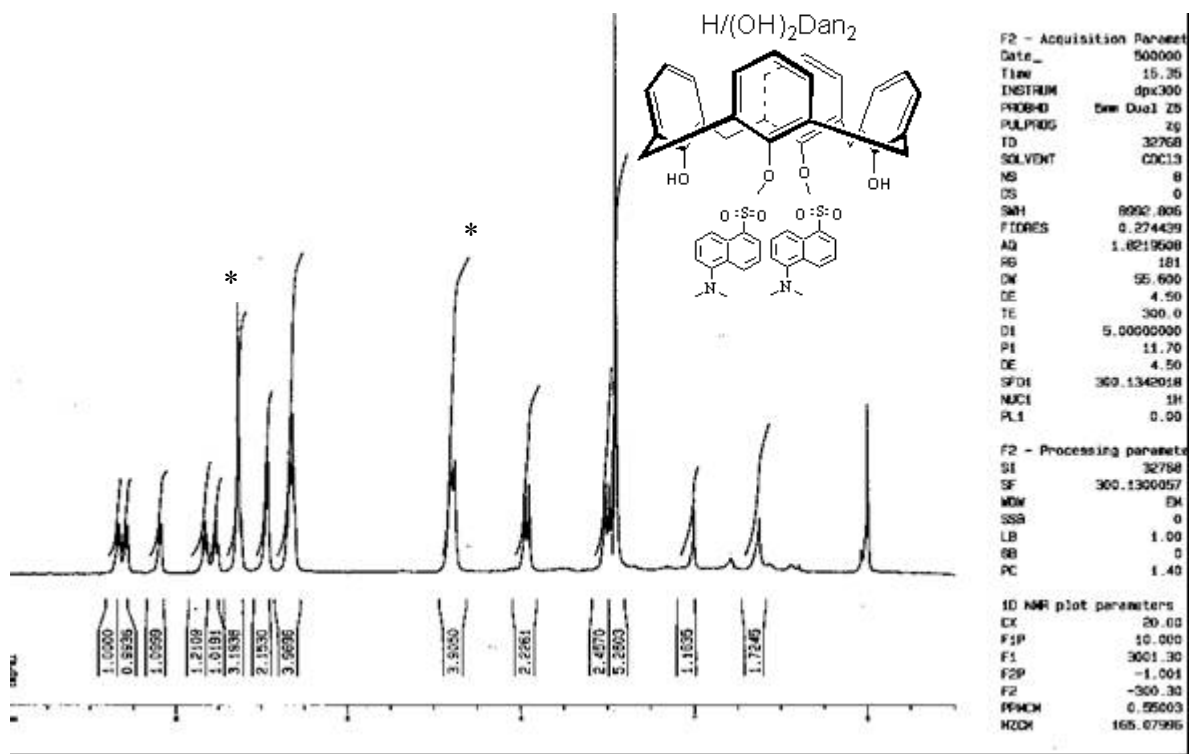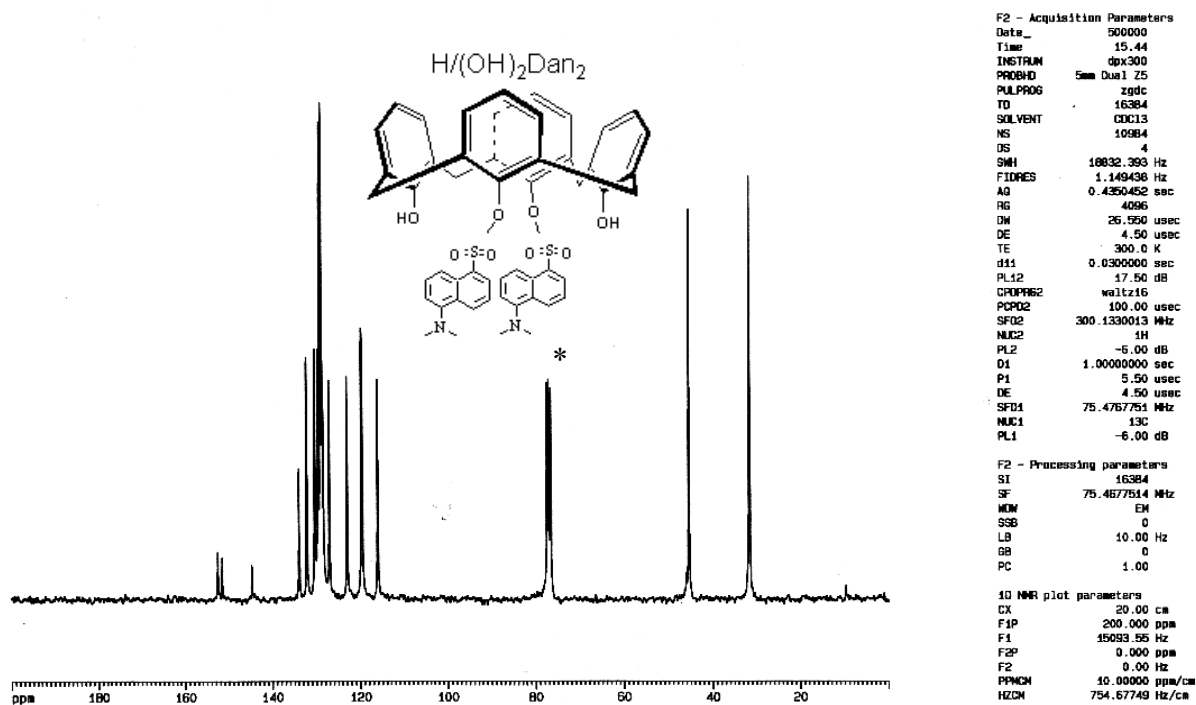



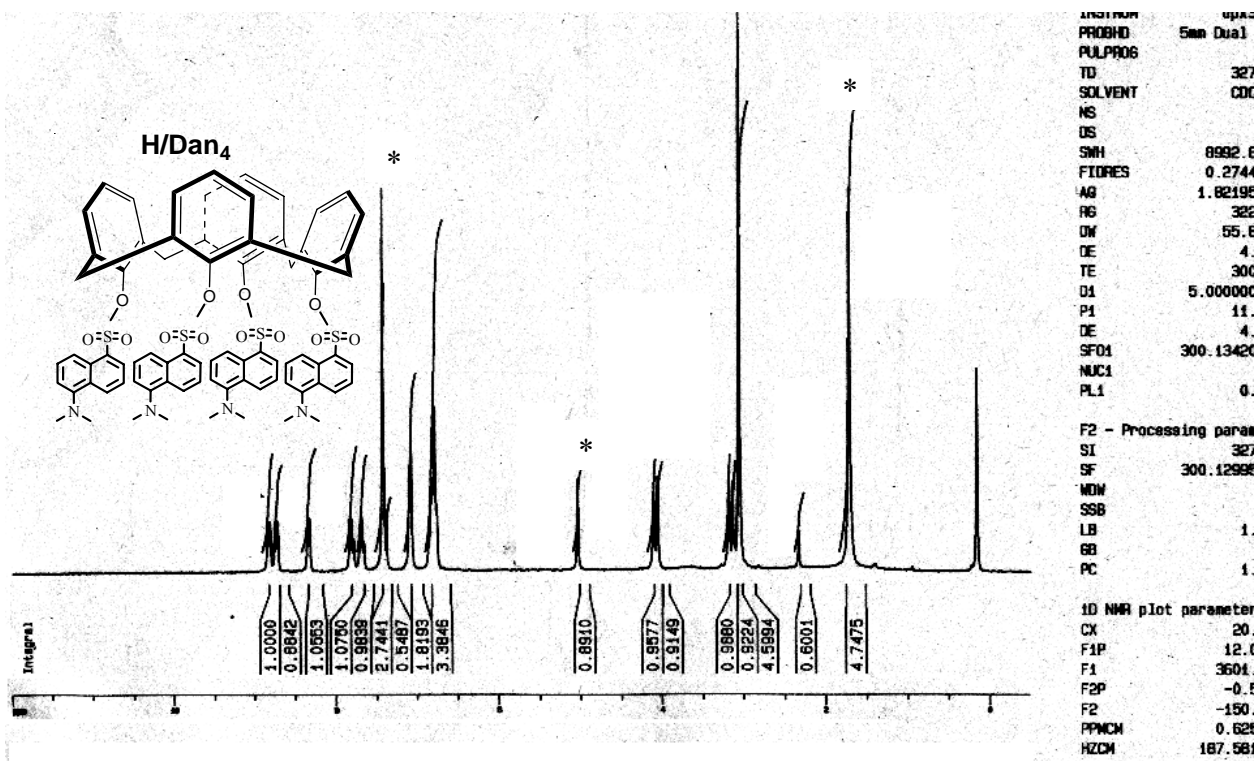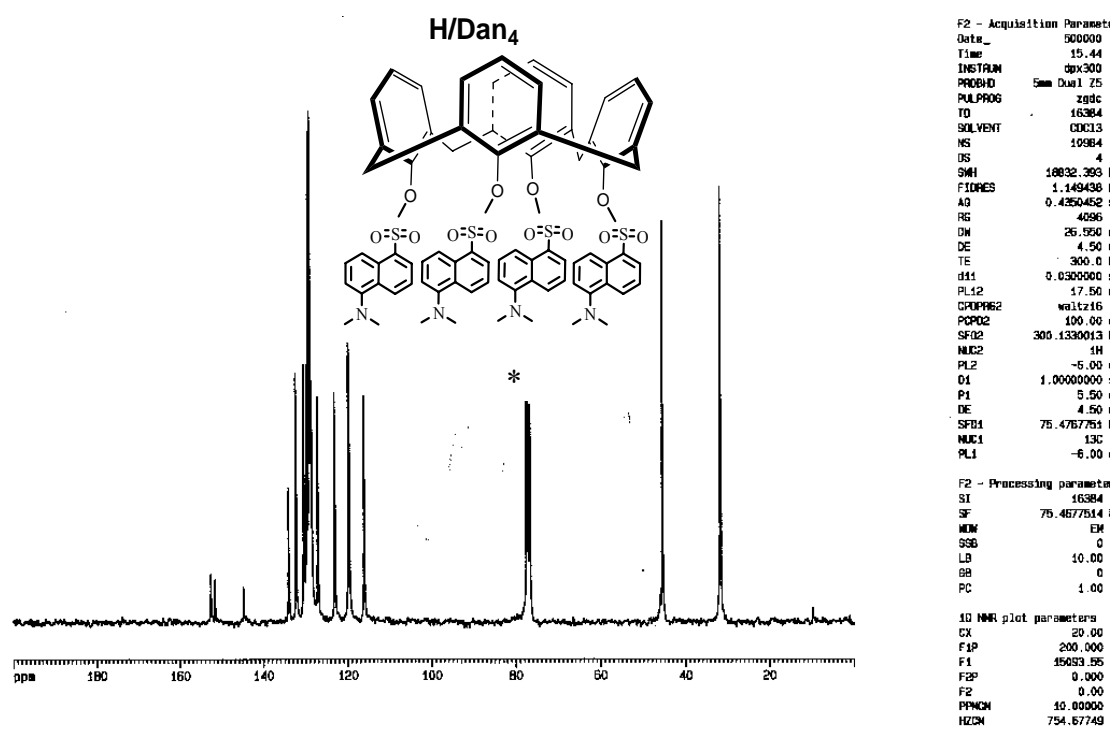

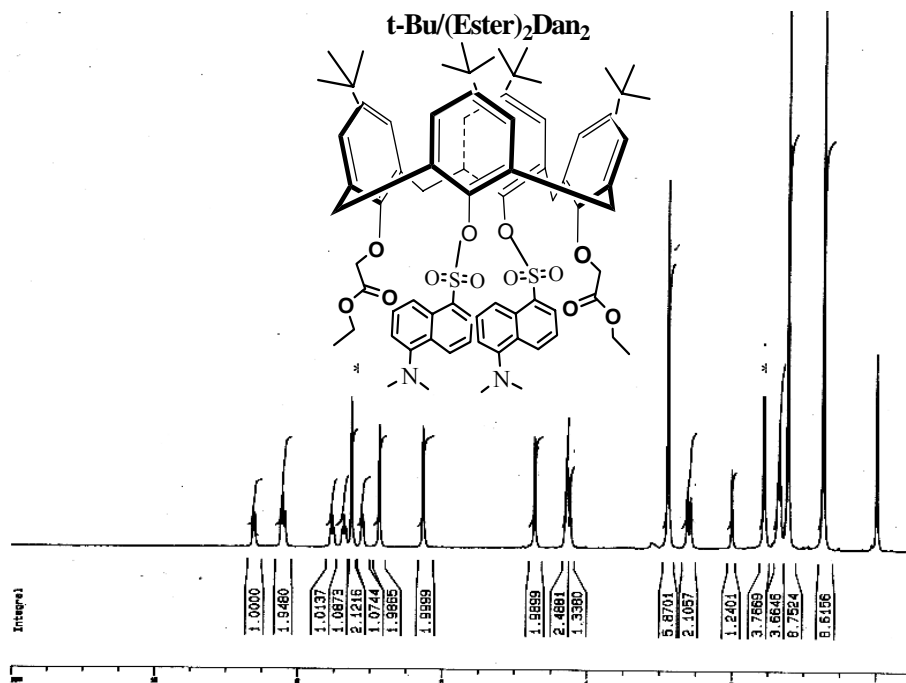

F2 - Acquisition Parameters  
 Date\_ 500000  
 Time 15.48  
 INSTRUM dpx300  
 PROBHD 5mm Dui1 Z5  
 PULPROG zg  
 TD 32768  
 SOLVENT CDCl3  
 NS 8  
 DS 0  
 SWH 8992.806 Hz  
 FIDRES 0.274439 Hz  
 AQ 1.8219508 sec  
 RG 256  
 DM 55.600 usec  
 DE 4.50 usec  
 TE 300.0 K  
 D1 5.0000000 sec  
 P1 11.70 usec  
 DE 4.50 usec  
 SFO1 300.1342018 MHz  
 NUC1 1H  
 PL1 0.00 dB

F2 - Processing parameters  
 SI 32768  
 SF 300.1300064 MHz  
 MDW EM  
 SSB 0  
 LB 1.00 Hz  
 GB 0  
 PC 1.40

1D NMR plot parameters  
 CX 20.00 cm  
 F1P 12.000 ppm  
 F1 3601.56 ppm  
 F2P -0.500 ppm  
 F2 -150.07 Hz  
 PPMCH 0.62500 ppm  
 HZCH 187.58125 Hz/

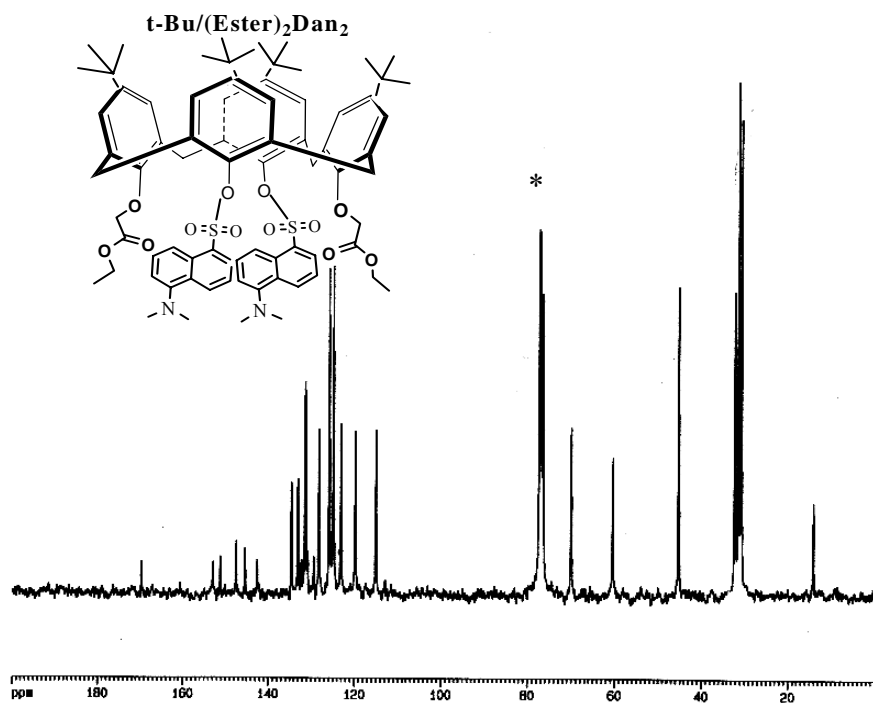

F2 - Acquisition Parameters  
 Date\_ 500000  
 Time 12.34  
 INSTRUM dpx300  
 PROBHD 5mm Dui1 Z5  
 PULPROG zgpg30  
 TD 16384  
 SOLVENT DMSO  
 NS 18392  
 DS 4  
 SWH 18832.383 Hz  
 FIDRES 1.149438 Hz  
 AQ 0.4350452 sec  
 RG 4096  
 DM 26.550 usec  
 DE 4.50 usec  
 TE 300.0 K  
 D11 0.0300000 sec  
 PL12 17.50 dB  
 CPOPRG2 waltz16  
 PCPD2 100.00 usec  
 SFO2 300.1330013 MHz  
 NUC2 13C  
 PL2 -6.00 dB  
 D1 1.0000000 sec  
 P1 5.50 usec  
 DE 4.50 usec  
 SFO1 75.4767751 MHz  
 NUC1 13C  
 PL1 -6.00 dB

F2 - Processing parameters  
 SI 16384  
 SF 75.4677503 MHz  
 MDW EM  
 SSB 0  
 LB 10.00 Hz  
 GB 0  
 PC 1.00

1D NMR plot parameters  
 CX 20.00 cm  
 F1P 200.000 ppm  
 F1 15093.55 Hz  
 F2P 0.000 ppm  
 F2 0.00 Hz  
 PPMCH 10.00000 ppm  
 HZCH 754.67749 Hz/

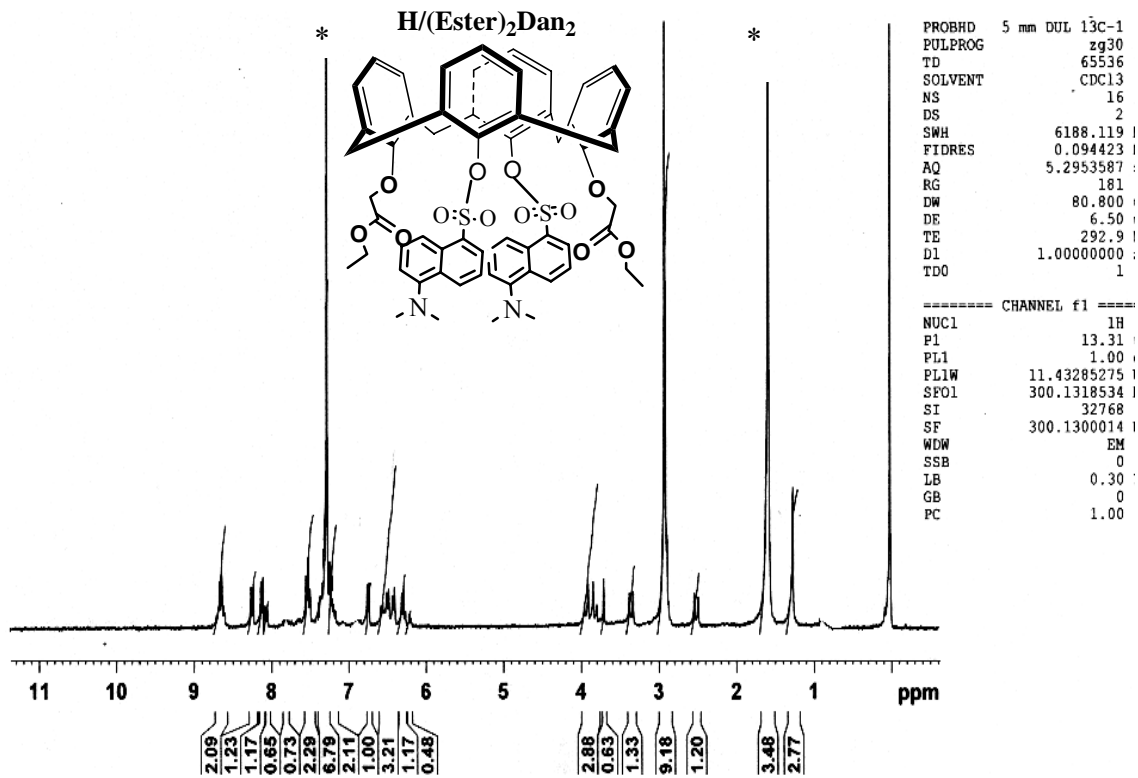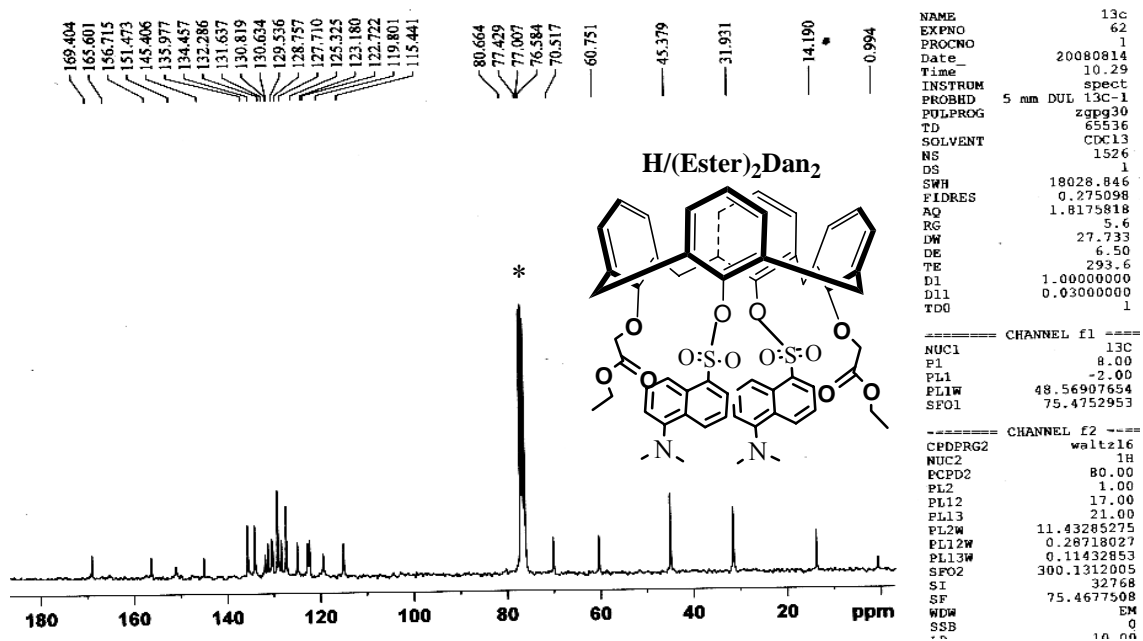

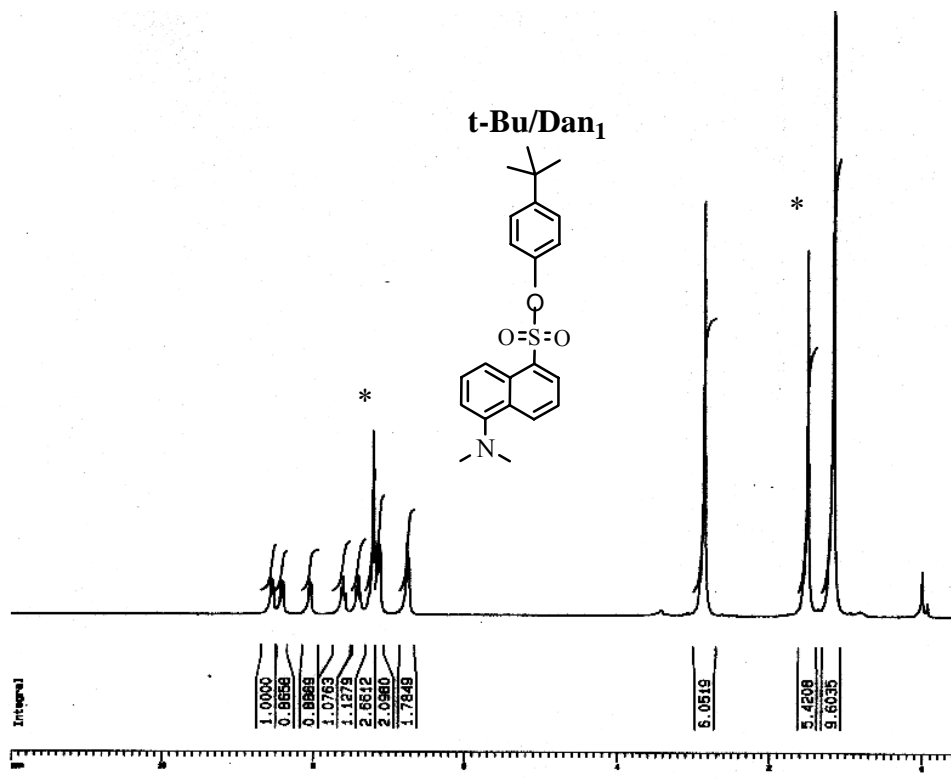

F2 - Acquisition Param  
 Date\_ 50001  
 Time 15.1  
 INSTRUM dpx3  
 PROBHD 5mm Dual 1  
 PULPROG 1  
 TD 3271  
 SOLVENT CDCl  
 NS  
 DS  
 SWH 8992.8K  
 FIDRES 0.2744K  
 AQ 1.82195K  
 RG 645  
 DM 55.6K  
 DE 5.1  
 TE 300.  
 D1 5.000000K  
 P1 7.1  
 DE 5.1  
 SFO1 300.133901  
 NUC1 1  
 PL1 -6.1

F2 - Processing param  
 SI 3271  
 SF 300.130027  
 MDW E  
 SSB  
 LB 1.0  
 GB  
 PC 1.4

1D NMR plot parameters  
 CX 20.0  
 F1P 12.00  
 F1 3601.5  
 F2P -0.50  
 F2 -150.0  
 PPMCH 0.6250  
 HZCN 187.5812

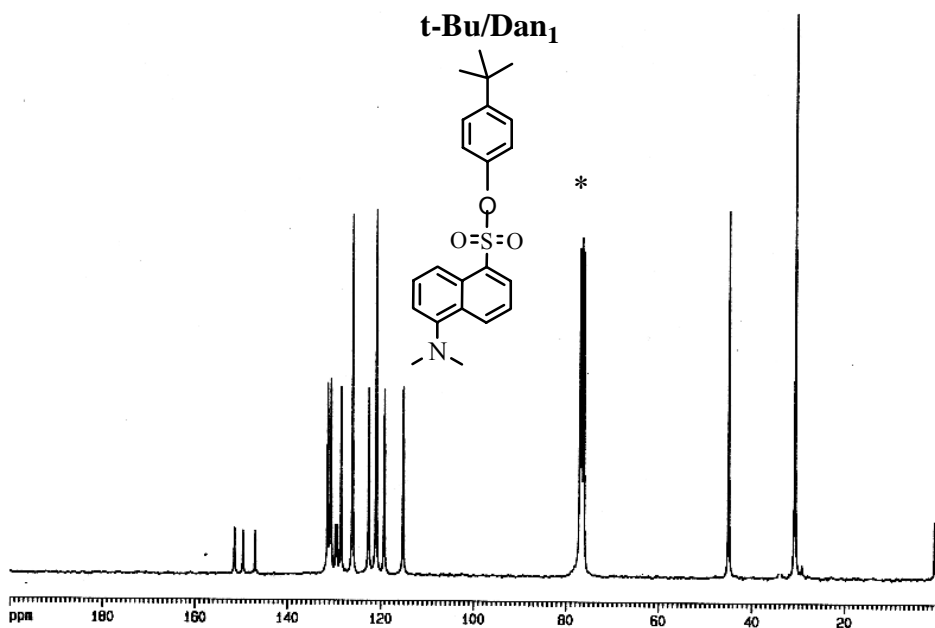

F2 - Acquisition Param  
 Date\_ 500000  
 Time 10.10  
 INSTRUM dpx300  
 PROBHD 5mm Dual Z5  
 PULPROG zgpgc  
 TD 16384  
 SOLVENT DMSO  
 NS 11706  
 DS 4  
 SWH 18832.383 K  
 FIDRES 1.149438 K  
 AQ 0.4300452 s  
 RG 4096  
 DM 26.550 u  
 DE 4.50 u  
 TE 300.0 K  
 d11 0.0300000 s  
 PL12 17.50 d  
 GPCPRG2 waitz16  
 PCPD2 100.00 u  
 SFO2 300.1330013 M  
 NUC2 1H  
 PL2 -6.00 d  
 D1 5.0000000 s  
 P1 5.50 u  
 DE 4.50 u  
 SFO1 75.4677751 M  
 NUC1 13C  
 PL1 -6.00 d

F2 - Processing parameter  
 SI 16384  
 SF 75.4677780 M  
 MDW EM  
 SSB 0  
 LB 10.00 H  
 GB 0  
 PC 1.00

1D NMR plot parameters  
 CX 20.00 D  
 F1P 200.000 D  
 F1 15083.56 K

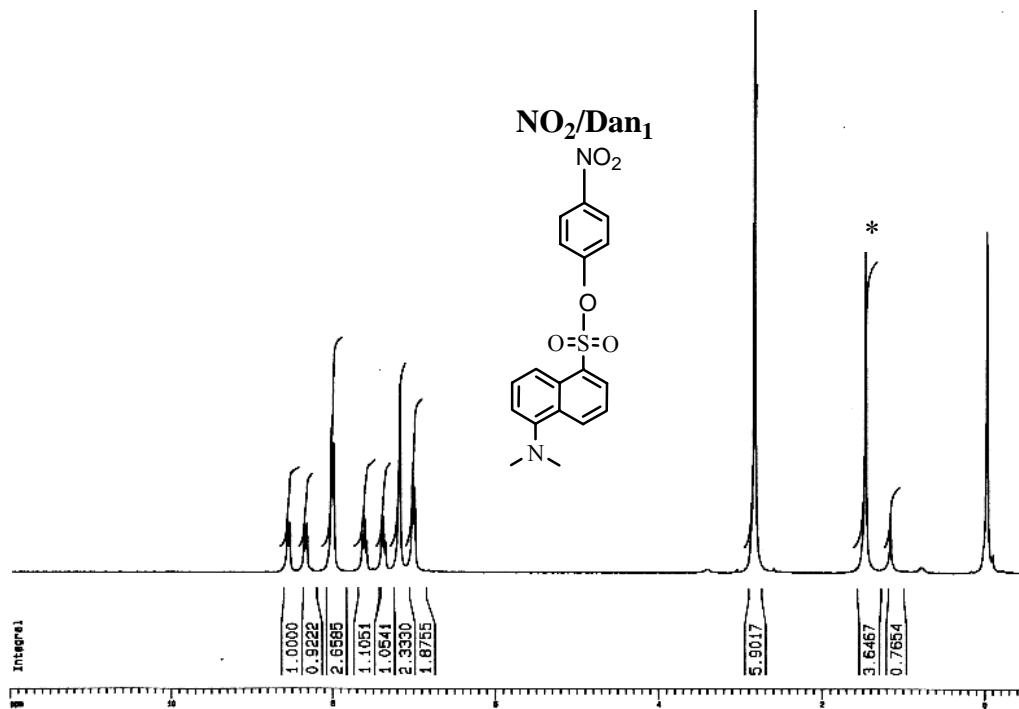

```

INSTRUM      upx:
PROBHD       5mm Dual
PULPROG
TD           327
SOLVENT      CDCl3
NS
DS
SMH         8992.6
FIDRES      0.2744
AQ         1.82198
RG         574
DN         55.6
DE         5.
TE         300
D1         5.000000
P1         7.
DE         5.
SF01       300.13390
NUC1
PL1         -6.

F2 - Processing param
SI         327
SF         300.13002
WDW
SSB
LB         1.
GB
PC         1.

1D NMR plot parameter
CX         20.
F1P        12.0
F1         3601.
F2P        -0.5
          1.
          2.
          31
  
```

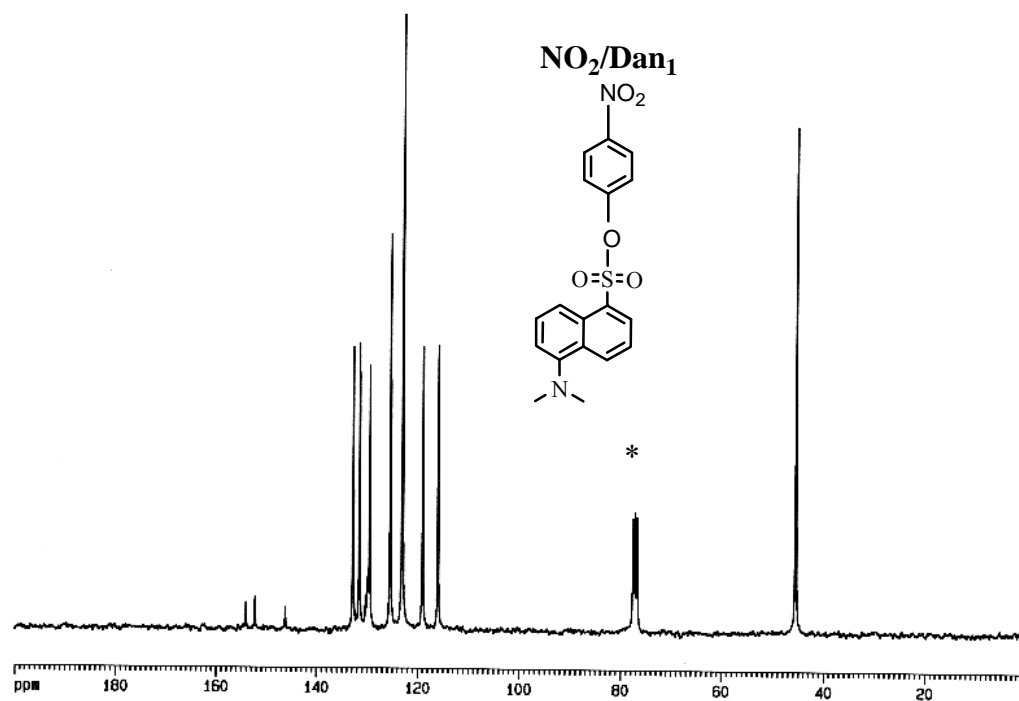

```

PULPROG
TD
SOLVENT
NS
DS
SMH
FIDRES
AQ
RG
DN
DE
TE
d11
PL12
CROPRG2
PCPD2
SF02       3
NUC2
PL2
D1
P1
DE
SF01
NUC1
PL1

F2 - Process1
SI
SF
WDW
SSB
LB
GB
PC

1D NMR plot p
CX
F1P
F1
F2P
F2
PPMCH
HZCM
  
```
